# Supplementary material for: Comparison between surgery and definitive chemoradiotherapy for patients with resectable esophageal squamous cell carcinoma: a propensity score analysis
Source: Springer Nature journal article supplement (doi:10.1007/s10147-016-0963-3), 2016-03-15
Supplement: MOESM1 [file 8750792]

Supplemental Table 1. Patient characteristics for each clinical stage

|  |  | Stage I | | |  | Stage II | | |  | Stage III | | |  | Stage IV | | |
| --- | --- | --- | --- | --- | --- | --- | --- | --- | --- | --- | --- | --- | --- | --- | --- | --- |
|  |  | S | CRT |  |  | S | CRT |  |  | S | CRT |  |  | S | CRT |  |
|  |  | n = 16 | n = 56 | *p* |  | n = 56 | n = 44 | *p* |  | n = 115 | n = 70 | *p* |  | n = 19 | n = 30 | *p* |
| Age | < 65 | 9 | 24 | 0.343 |  | 30 | 17 | 0.137 |  | 68 | 28 | 0.012 |  | 7 | 13 | 0.652 |
|  | ≥ 65 | 7 | 32 |  |  | 26 | 27 |  |  | 47 | 42 |  |  | 12 | 17 |  |
| Gender | Male | 10 | 51 | 0.005 |  | 49 | 39 | 0.862 |  | 96 | 63 | 0.216 |  | 18 | 25 | 0.235 |
|  | Female | 6 | 5 |  |  | 7 | 5 |  |  | 19 | 7 |  |  | 1 | 5 |  |
| PS | 0 | 9 | 40 | 0.251 |  | 25 | 21 | 0.759 |  | 14 | 6 | 0.444 |  | 5 | 7 | 0.813 |
|  | 1 | 7 | 16 |  |  | 31 | 23 |  |  | 101 | 64 |  |  | 14 | 23 |  |
| Cancer site | Lt | 5 | 17 | 0.973 |  | 15 | 9 | 0.715 |  | 47 | 21 | 0.097 |  | 6 | 9 | 0.981 |
|  | Mt | 9 | 33 |  |  | 33 | 27 |  |  | 52 | 43 |  |  | 9 | 14 |  |
|  | Ut | 2 | 6 |  |  | 8 | 8 |  |  | 16 | 6 |  |  | 4 | 7 |  |
| Primary tumor length, cm | Median | 2 | 3 | 0.019 |  | 4 | 3 | 0.061 |  | 5 | 5 | 0.105 |  | 4 | 5 | 0.178 |
|  | Range | 1-6 | 1-14 |  |  | 1.5-15 | 1-15 |  |  | 2-10 | 2-13 |  |  | 1.5-9 | 2-10 |  |
| Histological grade | 1 | 4 | 12 | 0.022 |  | 3 | 8 | 0.083 |  | 14 | 6 | <0.001 |  | 1 | 2 | 0.019 |
|  | 2 | 10 | 16 |  |  | 37 | 20 |  |  | 77 | 28 |  |  | 16 | 13 |  |
|  | 3 | 1 | 2 |  |  | 5 | 3 |  |  | 16 | 8 |  |  | 2 | 5 |  |
|  | x | 1 | 26 |  |  | 11 | 13 |  |  | 8 | 28 |  |  | 0 | 10 |  |
| cT stage | 1 | 5 | 52 | <0.001 |  | 22 | 25 | 0.155 |  | 2 | 3 | 0.557 |  | 2 | 3 | 0.84 |
|  | 2 | 11 | 4 |  |  | 12 | 9 |  |  | 4 | 3 |  |  | 1 | 3 |  |
|  | 3 | 0 | 0 |  |  | 22 | 10 |  |  | 109 | 64 |  |  | 16 | 24 |  |
| cN stage | 0 | 16 | 56 | - |  | 22 | 10 | 0.078 |  | 0 | 0 | 0.145 |  | 1 | 5 | 0.48 |
|  | 1 | 0 | 0 |  |  | 34 | 34 |  |  | 76 | 38 |  |  | 6 | 10 |  |
|  | 2 | 0 | 0 |  |  | 0 | 0 |  |  | 39 | 31 |  |  | 12 | 14 |  |
|  | 3 | 0 | 0 |  |  | 0 | 0 |  |  | 0 | 1 |  |  | 0 | 1 |  |
| cM stage | 0 | 16 | 56 | - |  | 0 | 0 | - |  | 0 | 0 | - |  | 0 | 0 | - |
|  | 1 | 0 | 0 |  |  | 0 | 0 |  |  | 0 | 0 |  |  | 0 | 0 |  |
| Serum albumin, g/dL | < 4 | 1 | 5 | 0.732 |  | 6 | 4 | 0.788 |  | 29 | 26 | 0.085 |  | 6 | 7 | 0.524 |
|  | ≥ 4 | 15 | 51 |  |  | 50 | 40 |  |  | 86 | 44 |  |  | 13 | 23 |  |
| Treatment year | 2003-2005 | 5 | 21 | 0.346 |  | 11 | 14 | 0.241 |  | 25 | 30 | 0.002 |  | 1 | 10 | 0.068 |
|  | 2006-2008 | 7 | 29 |  |  | 16 | 14 |  |  | 37 | 23 |  |  | 8 | 10 |  |
|  | 2009-2013 | 4 | 6 |  |  | 29 | 16 |  |  | 53 | 17 |  |  | 10 | 10 |  |
| Follow-up period, months | Median | 71.8 | 69.8 | 0.6325 |  | 56 | 79.4 | 0.072 |  | 60.1 | 20.7 | <0.001 |  | 17.0 | 31.4 | 0.211 |
|  | Range | 32.2-135.5 | 10.4-138.3 |  |  | 8.6-135.9 | 17.0-123.0 |  |  | 6.5-137.3 | 1.4-111.2 |  |  | 17-87.6 | 1.7-79.7 |  |

S, surgery; CRT, chemoradiotherapy; c, clinical; Lt, lower thoracic; Mt, middle thoracic; Ut, upper thoracic

Supplemental Table 2. Patient characteristics for each clinical stage after matching

|  |  | Stage I | | |  | Stage II | | |  | Stage III | | |  | Stage IV | | |
| --- | --- | --- | --- | --- | --- | --- | --- | --- | --- | --- | --- | --- | --- | --- | --- | --- |
|  |  | S | CRT |  |  | S | CRT |  |  | S | CRT |  |  | S | CRT |  |
|  |  | n = 12 | n = 13 | *p* |  | n = 53 | n = 42 | *p* |  | n = 99 | n = 63 | *p* |  | n = 18 | n = 19 | *p* |
| Age | < 65 | 6 | 6 | 0.848 |  | 27 | 16 | 0.211 |  | 53 | 25 | 0.085 |  | 6 | 7 | 0.823 |
|  | ≥ 65 | 6 | 7 |  |  | 26 | 26 |  |  | 46 | 38 |  |  | 12 | 12 |  |
| Gender | Male | 9 | 11 | 0.548 |  | 46 | 37 | 0.849 |  | 87 | 57 | 0.608 |  | 17 | 17 | 0.580 |
|  | Female | 3 | 2 |  |  | 7 | 5 |  |  | 12 | 6 |  |  | 1 | 2 |  |
| PS | 0 | 7 | 7 | 0.821 |  | 25 | 19 | 0.851 |  | 14 | 5 | 0.231 |  | 5 | 3 | 0.376 |
|  | 1 | 5 | 6 |  |  | 28 | 23 |  |  | 85 | 58 |  |  | 13 | 16 |  |
| Cancer site | Lt | 4 | 4 | 0.863 |  | 14 | 8 | 0.699 |  | 41 | 20 | 0.126 |  | 5 | 6 | 0.878 |
|  | Mt | 7 | 7 |  |  | 31 | 27 |  |  | 44 | 38 |  |  | 9 | 10 |  |
|  | Ut | 1 | 2 |  |  | 8 | 7 |  |  | 14 | 5 |  |  | 4 | 3 |  |
| Primary tumor length, cm | Median | 2 | 2 | 0.588 |  | 4 | 3 | 0.100 |  | 5 | 5 | 0.316 |  | 4 | 6 | 0.168 |
|  | Range | 1-6 | 1-5 |  |  | 1.5-15 | 1-15 |  |  | 2-10 | 2-13 |  |  | 1.5-9 | 2-10 |  |
| Histological grade | 1 | 4 | 7 | 0.758 |  | 3 | 8 | 0.067 |  | 9 | 4 | <0.001 |  | 0 | 2 | 0.075 |
|  | 2 | 6 | 4 |  |  | 35 | 20 |  |  | 66 | 28 |  |  | 16 | 11 |  |
|  | 3 | 1 | 1 |  |  | 4 | 1 |  |  | 16 | 8 |  |  | 2 | 2 |  |
|  | x | 1 | 1 |  |  | 11 | 13 |  |  | 8 | 23 |  |  | 0 | 4 |  |
| cT stage | 1 | 5 | 10 | 0.072 |  | 22 | 23 | 0.368 |  | 2 | 2 | 0.874 |  | 2 | 1 | 0.806 |
|  | 2 | 7 | 3 |  |  | 12 | 9 |  |  | 4 | 3 |  |  | 1 | 1 |  |
|  | 3 | 0 | 0 |  |  | 19 | 10 |  |  | 93 | 58 |  |  | 15 | 17 |  |
| cN stage | 0 | 12 | 13 | - |  | 19 | 10 | 0.206 |  | 0 | 0 | 0.335 |  | 1 | 2 | 0.716 |
|  | 1 | 0 | 0 |  |  | 34 | 32 |  |  | 62 | 35 |  |  | 6 | 6 |  |
|  | 2 | 0 | 0 |  |  | 0 | 0 |  |  | 37 | 27 |  |  | 11 | 10 |  |
|  | 3 | 0 | 0 |  |  | 0 | 0 |  |  | 0 | 1 |  |  | 0 | 1 |  |
| cM stage | 0 | 12 | 13 | - |  | 53 | 42 | - |  | 99 | 63 | - |  | 0 | 0 | - |
|  | 1 | 0 | 0 |  |  | 0 | 0 |  |  | 0 | 0 |  |  | 18 | 19 |  |
| Serum albumin, g/dL | < 4 | 1 | 0 | 0.288 |  | 6 | 3 | 0.490 |  | 27 | 23 | 0.215 |  | 5 | 4 | 0.634 |
|  | ≥ 4 | 11 | 13 |  |  | 47 | 39 |  |  | 72 | 40 |  |  | 13 | 15 |  |
| Treatment year | 2003-2005 | 4 | 4 | 0.982 |  | 11 | 12 | 0.440 |  | 23 | 25 | 0.055 |  | 1 | 4 | 0.386 |
|  | 2006-2008 | 6 | 7 |  |  | 15 | 14 |  |  | 35 | 21 |  |  | 7 | 6 |  |
|  | 2009-2013 | 2 | 2 |  |  | 27 | 16 |  |  | 41 | 17 |  |  | 10 | 9 |  |
| Follow-up period, months | Median | 74.1 | 50.4 | 0.518 |  | 56.0 | 79.4 | 0.072 |  | 60.1 | 20.7 | <0.001 |  | 17.0 | 31.4 | 0.211 |
|  | Range | 32.2-135.5 | 34.9-138.2 |  |  | 8.6-135.9 | 17.0-123.0 |  |  | 6.5-137.3 | 1.4-111.2 |  |  | 17-87.6 | 1.7-79.7 |  |

S, surgery; CRT, chemoradiotherapy; c, clinical; Lt, lower thoracic; Mt, middle thoracic; Ut, upper thoracic

Supplemental Table 3. Post-treatment progression

|  |  |  | Stage I | |  | Stage II | |  | Stage III | |  | Stage IV | |
| --- | --- | --- | --- | --- | --- | --- | --- | --- | --- | --- | --- | --- | --- |
|  |  |  | S | CRT |  | S | CRT |  | S | CRT |  | S | CRT |
|  |  |  | n = 16 | n = 56 |  | n = 56 | n = 44 |  | n = 115 | n = 70 |  | n = 19 | n = 30 |
| Pattern of progression | |  |  |  |  |  |  |  |  |  |  |  |  |
|  | None |  | 12 | 41 |  | 40 | 31 |  | 51 | 23 |  | 11 | 10 |
|  | Locoreginal |  | 3 | 8 |  | 4 | 7 |  | 25 | 26 |  | 4 | 10 |
|  | Distant |  | 1 | 5 |  | 12 | 6 |  | 39 | 19 |  | 4 | 9 |
|  | Unknown |  | 0 | 2 |  | 0 | 0 |  | 0 | 2 |  | 0 | 1 |
|  |  |  |  |  |  |  |  |  |  |  |  |  |  |
|  |  |  | n = 4 | n = 15 |  | n = 16 | n = 13 |  | n = 64 | n = 47 |  | n = 8 | n = 20 |
| Treatment after progression | |  |  |  |  |  |  |  |  |  |  |  |  |
|  | None |  | 0 | 1 |  | 1 | 2 |  | 9 | 7 |  | 1 | 8 |
|  | Chemotherapy alone |  | 4 | 6 |  | 9 | 8 |  | 29 | 25 |  | 4 | 10 |
|  | Chemoradiotherapy |  | 0 | 2 |  | 3 | 1 |  | 21 | 2 |  | 2 | 0 |
|  | Radiotherapy alone |  | 0 | 0 |  | 1 | 0 |  | 5 | 3 |  | 1 | 0 |
|  | Surgery |  | 0 | 2 |  | 0 | 1 |  | 0 | 1 |  | 0 | 1 |
|  | Endoscopic resection |  | 0 | 3 |  | 1 | 1 |  | 0 | 1 |  | 0 | 0 |
|  | Stent |  | 0 | 0 |  | 0 | 0 |  | 0 | 7 |  | 0 | 0 |
|  | Unknown |  | 0 | 1 |  | 1 | 0 |  | 0 | 1 |  | 0 | 1 |

S, surgery; CRT, chemoradiotherapy
